# Supplementary material for: Insomnia Symptoms and Daytime Fatigue Co-Occurrence in Adolescent and Young Adult Childhood Cancer Patients in Follow-Up after Treatment: Prevalence and Associated Risk Factors
Source: MDPI journal article supplement (doi:10.3390/cancers14143316), 2022-07-07
Supplement: s1 [file s1]

Supplementary material.

# Insomnia symptoms and daytime fatigue co-occurrence in adolescent and young adult childhood cancer patients in follow-up after treatment: prevalence and associated risk factors

Shosha H. M. Peersmann<sup>1,2</sup>, Martha A. Grootenhuys<sup>1,7</sup>, Annemieke van Straten<sup>3</sup>, Wim J.E. Tissing<sup>1,4</sup>, Floor Abbink<sup>2</sup>, Andrica C.H. de Vries<sup>1,5</sup>, Jacqueline Loonen<sup>6</sup>, Helena J. H. van der Pal<sup>1</sup>, Gertjan J.L. Kaspers<sup>1,2</sup> and Raphaële R. L. van Litsenburg<sup>1,2\*</sup>

**Table S1.** Overview of self-reported co-morbid health conditions ( $n = 101$ )\*.

| Type of condition                    | Number of cases |
|--------------------------------------|-----------------|
| Psychological                        | 20              |
| Neurological                         | 15              |
| Respiratory                          | 11              |
| Behavior and developmental           | 8               |
| Gastro-intestinal                    | 8               |
| Endocrinological                     | 8               |
| Allergies                            | 5               |
| Orthopedic                           | 5               |
| Nephrological                        | 4               |
| Auto-immune disorders                | 4               |
| Congenital and genetic abnormalities | 3               |
| Cardiovascular                       | 2               |
| Other                                | 14              |

\*Note. Some patients reported multiple types of conditions, the total number of cases does therefore not count up to the total  $n = 101$ .

**Table S2.** Univariate analyses of determinants of insomnia–fatigue subgroups within multinomial regression analyses (OR and 95% CI).

| <b>Reference:<br/>No symptoms (<i>n</i> = 349)</b>                                                                                | <b>Insomnia and Fatigue<br/>(<i>n</i> = 104)</b>               | <b>Insomnia-only (<i>n</i> = 75)</b>                  | <b>Fatigue-only (<i>n</i> = 37)</b>                                   |
|-----------------------------------------------------------------------------------------------------------------------------------|----------------------------------------------------------------|-------------------------------------------------------|-----------------------------------------------------------------------|
| Female                                                                                                                            | <b>2.98 (1.23–3.37)***</b>                                     | <b>2.03 (1.23–3.37)**</b>                             | <b>6.26 (2.67–14.68)***</b>                                           |
| Young adults (ref: adolescents)                                                                                                   | <b>2.43 (1.55–3.80)***</b>                                     | 0.77 (.46–1.32)                                       | <b>3.04 (1.49–6.17)**</b>                                             |
| High educational level (ref: low/middle)                                                                                          | 0.93 (.52–1.65)                                                | 0.52 (.24–1.13)                                       | <b>2.17 (1.03–4.56)*</b>                                              |
| Living with parents                                                                                                               | 0.74 (.36–1.49)                                                | 1.13 (.45–2.81)                                       | 0.49 (.19–1.27)                                                       |
| Having a comorbid health condition                                                                                                | <b>3.74 (2.20–6.37)***</b>                                     | <b>2.46 (1.30–4.66)**</b>                             | <b>3.91 (1.81–8.43)**</b>                                             |
| Age at diagnosis in years                                                                                                         | <b>1.12 (1.03–1.20)**</b>                                      | 1.05 (.97–1.14)                                       | <b>1.18 (1.03–1.34)*</b>                                              |
| Cancer diagnosis:<br>Hemato<br>Solid<br>(ref: CNS)                                                                                | 0.90 (.53–1.54)<br>0.68 (.38–1.22)                             | <b>2.14 (1.01–4.51)*</b><br>2.11 (.97–4.58)           | 1.15 (.47–2.81)<br>1.23 (.49–3.09)                                    |
| Type of oncologic treatment <sup>1</sup> :<br>Surgery only<br>Chemotherapy with or without surgery<br>(ref: Radiation and/or SCT) | 1.17 (.63–2.15)<br>0.99 (.60–1.64)                             | 1.09 (.53–2.24)<br>1.10 (.62–1.95)                    | 0.77 (.28–2.13)<br>0.95 (.45–2.01)                                    |
| Time since end of treatment (in years)                                                                                            | 1.00 (.90–1.10)                                                | <b>0.86 (.76–.98)*</b>                                | 0.98 (.83–1.14)                                                       |
| Sleeping together                                                                                                                 | <b>3.34 (1.64–6.82)**</b>                                      | 1.31 (.47–3.66)                                       | 1.67 (.47–5.97)                                                       |
| Needing someone else to fall asleep                                                                                               | <b>2.31 (1.64–3.27)***</b>                                     | <b>1.74 (1.15–2.62)**</b>                             | 0.82 (.27–2.47)                                                       |
| Bedtime routine                                                                                                                   | <b>1.25 (1.06–1.47)**</b>                                      | 1.05 (.88–1.25)                                       | 1.14 (.90–1.46)                                                       |
| Trying to fall asleep every night at the same time                                                                                | <b>1.35 (1.11–1.64)**</b>                                      | 1.14 (.92–1.41)                                       | 1.17 (.87–1.56)                                                       |
| Waking up every morning at the same time                                                                                          | <b>0.71 (.58–.86)***</b>                                       | 0.82 (.66–1.03)                                       | 0.77 (.57–1.04)                                                       |
| Bedtime technology:<br>TV<br>Gaming<br>Phone/computer                                                                             | 1.06 (.88–1.27)<br>0.96 (.81–1.15)<br><b>1.20 (1.00–1.44)*</b> | 1.05 (.85–1.30)<br>1.08 (.89–1.30)<br>0.97 (.81–1.17) | 0.92 (.70–1.21)<br><b>0.72 (.52–.99)*</b><br><b>1.45 (1.05–2.00)*</b> |

Note. if significant asterisks were added \* &lt;.05, \*\*&lt;.01 \*\*\*&lt;.001.

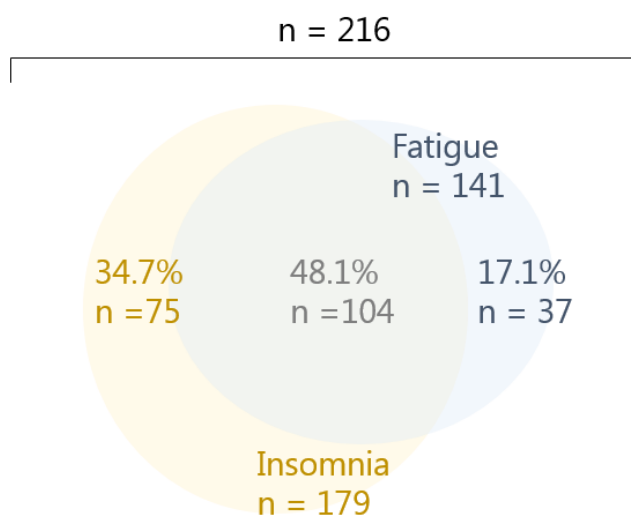

**Figure S1.** Overlap between insomnia and fatigue in the total group of patients with either insomnia and/or fatigue symptoms ( $n = 216$ ).
